# Supplementary material for: Evaluation of the sensitivity and specificity of a novel line immunoassay for the detection of criteria and non-criteria antiphospholipid antibodies in comparison to established ELISAs
Source: PLoS One. 2019 Jul 24;14(7):e0220033. doi: 10.1371/journal.pone.0220033 (PMC6655644; doi:10.1371/journal.pone.0220033)
Supplement: S1 File — Data underlying the findings described in the manuscript. (CSV) [file pone.0220033.s007.csv]

sex	thrombosis arterial	thrombosis venous	pregnancy complications	group	primary or secondary APS	age	ALE aCL IgG [GPL-U/ml]	ALE aCL IgG qualitative	ACU aCL IgG [U/ml]	ACU aCL IgG qualitative	UNI aCL IgG [GPL-U/ml]	UNI aCL IgG qualitative	AES aCL IgG [GPL/ml]	AES aCL IgG qualitative	ALE aCL IgM [MPL-U/ml]	ALE aCL IgM qualitative	ACU aCL IgM [U/ml]	ACU aCL IgM qualitative	UNI aCL IgM [MPL-U/ml]	UNI aCL IgM qualitative	AES aCL IgM [MPL/ml]	AES aCL IgM qualitative	ALE aGPI IgG [U/ml]	ALE aGPI IgG qualitative	ACU aGPI IgG [U/ml]	ACU aGPI IgG qualitative	UNI aGPI IgG [U/ml]	UNI aGPI IgG qualitative	AES aGPI IgG [U/ml]	AES aGPI IgG qualitative	ALE aGPI IgM [U/ml]	ALE aGPI IgM qualitative	ACU aGPI IgM [U/ml]	ACU aGPI IgM qualitative	UNI aGPI IgM [U/ml]	UNI aGPI IgM qualitative	AES aGPI IgM [U/ml]	AES aGPI IgM qualitative	GA aCL IgG	GA aPA IgG	GA aPC IgG	GA aPE IgG	GA aPG IgG	GA aPI IgG	GA aPS IgG	GA aAnnV IgG	GA aGPI IgG	GA aPT IgG	GA aCL IgM
w	yes	yes	no	APS	primary	55	298.0	positive	725.5	positive	4.3	negative	>315,0	positive	0.7	negative	1.4	negative	0.1	negative	0.109	negative	567.0	positive	5316.3	positive	383	positive	37.740	positive	1.8	negative	1.4	negative	0	negative	1.080	negative	positive	positive	negative	negative	positive	positive	positive	negative	positive	positive	negative
w	no	yes	yes	APS	secondary	35	9.3	negative	83.8	positive	7.2	negative	18.585	positive	7.6	positive	18.0	negative	9.1	negative	0.980	negative	8.2	positive	69.5	positive	2.1	negative	3.907	negative	6.3	negative	18.9	negative	4.5	negative	6.468	negative	negative	positive	negative	negative	negative	negative	positive	negative	positive	negative	negative
w	yes	no	no	APS	primary	54	143.0	positive	2464.9	positive	254	positive	>315,0	positive	64.2	positive	339.1	positive	363	positive	28.947	positive	83.0	positive	6450.2	positive	112	positive	6.818	negative	27.1	positive	99.2	positive	53	positive	12.768	negative	positive	positive	negative	negative	positive	positive	positive	negative	positive	positive	negative
w	no	no	no	control	not applicable	50	4.0	negative	13.1	negative	1.5	negative	4.053	negative	0.7	negative	2.2	negative	1.4	negative	0.069	negative	2.9	negative	21.4	positive	0.9	negative	1.494	negative	1.3	negative	1.3	negative	0	negative	1.458	negative	negative	negative	negative	negative	negative	negative	negative	negative	negative	negative	negative
m	no	no	no	control	not applicable	51	3.2	negative	3.1	negative	4.4	negative	11.126	negative	0.6	negative	3.3	negative	2.8	negative	0.054	negative	3.3	negative	3.7	negative	1.7	negative	0.197	negative	1.6	negative	0.4	negative	0	negative	2.555	negative	negative	negative	negative	negative	negative	negative	negative	negative	negative	negative	negative
m	no	no	no	control	not applicable	39	2.9	negative	1.8	negative	1.1	negative	6.286	negative	2.3	negative	15.7	negative	7.6	negative	0.929	negative	3.0	negative	6.7	negative	0.7	negative	0.030	negative	3.0	negative	2.7	negative	0.8	negative	1.112	negative	negative	negative	negative	negative	negative	negative	negative	negative	negative	positive	negative
m	no	no	no	control	not applicable	52	3.9	negative	1.3	negative	1.7	negative	3.707	negative	1.6	negative	5.8	negative	3.2	negative	0.270	negative	2.9	negative	5.7	negative	1.2	negative	0.239	negative	1.6	negative	0.6	negative	0	negative	1.169	negative	negative	negative	negative	negative	negative	negative	negative	negative	negative	negative	negative
w	no	no	no	control	not applicable	37	2.6	negative	8.0	negative	1.7	negative	2.312	negative	0.7	negative	2.3	negative	0	negative	0.104	negative	2.6	negative	2.8	negative	0.7	negative	0.627	negative	1.4	negative	0.7	negative	0	negative	1.853	negative	negative	negative	negative	negative	negative	negative	negative	negative	negative	negative	negative
m	no	yes	no	APS	secondary	32	81.5	positive	1939.1	positive	4.9	negative	269.537	positive	3.1	negative	4.4	negative	4.5	negative	0.531	negative	80.0	positive	2936.8	positive	92	positive	7.275	negative	3.1	negative	6.2	negative	1.6	negative	3.531	negative	positive	positive	negative	negative	positive	positive	positive	negative	positive	negative	negative
m	no	no	no	control	not applicable	35	3.3	negative	3.0	negative	2.8	negative	2.657	negative	0.8	negative	0.7	negative	0	negative	0.017	negative	2.1	negative	2.1	negative	1.1	negative	0.151	negative	1.4	negative	0.1	negative	0	negative	0.384	negative	negative	negative	negative	negative	negative	negative	negative	negative	negative	negative	negative
w	no	no	yes	APS	primary	52	6.9	negative	5.8	negative	1.4	negative	8.663	negative	112.5	positive	249.3	positive	133	positive	31.963	positive	7.3	negative	7.2	negative	0.9	negative	0.535	negative	90.0	positive	81.1	positive	27	positive	95.501	positive	negative	negative	negative	negative	negative	negative	negative	positive	negative	negative	negative
w	no	yes	no	APS	secondary	74	28.5	positive	23.0	positive	1.7	negative	60.681	positive	57.1	positive	52.0	positive	23	negative	7.751	negative	23.3	positive	285.2	positive	16	positive	1.515	negative	73.1	positive	115.0	positive	86	positive	55.313	positive	positive	positive	negative	negative	positive	positive	positive	negative	positive	positive	positive
w	no	no	no	control	not applicable	39	2.6	negative	3.5	negative	2.3	negative	2.527	negative	1.5	negative	7.4	negative	2	negative	0.230	negative	2.7	negative	4.0	negative	0.7	negative	0.232	negative	2.2	negative	9.3	negative	0.3	negative	1.315	negative	negative	negative	negative	negative	negative	negative	negative	negative	negative	negative	negative
w	no	no	no	control	not applicable	58	2.1	negative	1.2	negative	1.4	negative	1.576	negative	0.5	negative	1.0	negative	0	negative	0.011	negative	2.4	negative	2.6	negative	1	negative	0.086	negative	1.3	negative	0.2	negative	0	negative	0.209	negative	negative	negative	negative	negative	negative	negative	negative	negative	negative	negative	negative
w	no	no	no	control	not applicable	19	3.0	negative	4.2	negative	2.5	negative	1.738	negative	1.0	negative	11.8	negative	0.5	negative	0.040	negative	3.1	negative	4.3	negative	1	negative	0.045	negative	1.6	negative	0.4	negative	0	negative	0.455	negative	negative	positive	negative	negative	negative	negative	negative	negative	positive	negative	negative
m	no	no	no	control	not applicable	15	3.0	negative	3.3	negative	1.5	negative	2.079	negative	1.5	negative	3.3	negative	3.1	negative	0.067	negative	2.9	negative	2.7	negative	1	negative	0.205	negative	2.9	negative	2.0	negative	0	negative	2.503	negative	negative	negative	negative	negative	negative	negative	negative	negative	negative	positive	negative
w	no	no	no	control	not applicable	46	4.6	negative	6.2	negative	1.0	negative	1.959	negative	1.9	negative	3.7	negative	3	negative	0.056	negative	2.9	negative	3.0	negative	0.6	negative	0.066	negative	1.9	negative	2.3	negative	1.3	negative	1.326	negative	negative	negative	negative	negative	negative	negative	negative	negative	negative	negative	negative
w	no	no	no	control	not applicable	51	2.8	negative	1.6	negative	1.2	negative	4.707	negative	1.0	negative	2.1	negative	0	negative	0.443	negative	2.4	negative	1.7	negative	0.8	negative	0.137	negative	1.2	negative	0.9	negative	0	negative	1.238	negative	negative	negative	negative	negative	negative	negative	negative	negative	negative	negative	negative
w	no	no	no	control	not applicable	50	2.5	negative	2.7	negative	2.5	negative	2.982	negative	0.8	negative	1.7	negative	0	negative	0.038	negative	2.6	negative	5.9	negative	1.1	negative	0.164	negative	1.9	negative	0.3	negative	0	negative	0.601	negative	negative	negative	negative	negative	negative	positive	negative	negative	negative	negative	negative
w	no	no	no	control	not applicable	58	2.5	negative	1.5	negative	1.1	negative	2.794	negative	1.2	negative	4.9	negative	0.6	negative	1.595	negative	2.2	negative	1.3	negative	0.6	negative	0.369	negative	0.7	negative	1.3	negative	0	negative	0.843	negative	negative	negative	negative	negative	negative	negative	negative	negative	negative	negative	negative
w	no	no	no	control	not applicable	21	2.2	negative	14.0	negative	1.3	negative	1.849	negative	0.9	negative	2.8	negative	0	negative	0.992	negative	2.5	negative	4.9	negative	0.7	negative	1.004	negative	1.4	negative	0.6	negative	0	negative	0.486	negative	negative	negative	negative	negative	negative	negative	negative	negative	negative	negative	negative
w	no	no	no	control	not applicable	53	2.5	negative	1.4	negative	2.7	negative	1.952	negative	0.9	negative	3.7	negative	0.6	negative	1.189	negative	2.4	negative	2.2	negative	1	negative	0.726	negative	1.4	negative	1.1	negative	0	negative	2.231	negative	negative	negative	negative	negative	negative	negative	negative	negative	negative	positive	negative
w	no	no	no	control	not applicable	55	3.8	negative	3.3	negative	1.5	negative	3.945	negative	1.4	negative	2.7	negative	5.3	negative	1.214	negative	2.7	negative	1.9	negative	0.8	negative	0.552	negative	1.6	negative	2.1	negative	0	negative	1.377	negative	negative	negative	negative	negative	negative	negative	negative	negative	negative	negative	negative
m	no	no	no	control	not applicable	35	3.1	negative	2.0	negative	2.4	negative	3.365	negative	2.2	negative	3.2	negative	0.6	negative	1.239	negative	2.8	negative	1.1	negative	0.8	negative	1.127	negative	3.4	negative	2.1	negative	0	negative	25.541	positive	negative	negative	negative	negative	negative	negative	negative	negative	negative	negative	negative
w	no	no	no	control	not applicable	69	2.4	negative	2.0	negative	0.7	negative	1.952	negative	0.5	negative	1.3	negative	0	negative	0.695	negative	2.5	negative	4.3	negative	0.7	negative	0.739	negative	1.2	negative	0.3	negative	0	negative	0.417	negative	negative	negative	negative	negative	negative	negative	negative	negative	negative	negative	negative
w	no	yes	no	APS	primary	48	34.4	positive	215.1	positive	159	positive	146.008	positive	1.4	negative	4.4	negative	1.6	negative	2.489	negative	14.3	positive	341.0	positive	12	positive	4.209	negative	2.3	negative	3.6	negative	0.2	negative	12.117	negative	positive	positive	negative	negative	negative	negative	positive	negative	positive	negative	negative
w	no	yes	no	APS	primary	23	63.0	positive	674.8	positive	51	positive	>315,0	positive	6.7	negative	8.9	negative	8.9	negative	9.447	negative	69.0	positive	2057.7	positive	97	positive	22.867	positive	4.2	negative	6.2	negative	5	negative	5.102	negative	positive	positive	negative	negative	positive	positive	positive	negative	positive	negative	negative
w	no	yes	yes	APS	secondary	42	34.6	positive	84.9	positive	80	positive	33.565	positive	3.7	negative	8.7	negative	26	negative	5.358	negative	62.5	positive	546.1	positive	64	positive	10.191	negative	3.6	negative	10.0	negative	5.3	negative	4.663	negative	positive	positive	negative	negative	positive	positive	positive	negative	positive	negative	negative
w	no	yes	no	APS	primary	34	21.7	positive	9.4	negative	5.8	negative	35.415	positive	107.0	positive	147.5	positive	63	positive	96.940	positive	15.5	positive	16.2	negative	1.8	negative	2.356	negative	100.0	positive	194.7	positive	127	positive	88.313	positive	positive	positive	negative	negative	negative	negative	negative	negative	negative	negative	positive
m	yes	no	no	APS	primary	38	177.0	positive	899.7	positive	77	positive	>315,0	positive	2.1	negative	3.4	negative	17	negative	3.008	negative	168.0	positive	5536.5	positive	214	positive	31.161	positive	2.6	negative	3.1	negative	2.6	negative	2.287	negative	positive	positive	negative	negative	positive	positive	positive	negative	positive	positive	negative
m	yes	no	no	APS	primary	78	24.8	positive	156.1	positive	5.7	negative	86.892	positive	0.8	negative	4.4	negative	0.4	negative	2.071	negative	10.6	positive	861.3	positive	91	positive	3.817	negative	1.5	negative	0.2	negative	0	negative	0.333	negative	positive	positive	negative	negative	positive	positive	positive	positive	positive	negative	negative
w	no	yes	no	APS	primary	39	68.0	positive	498.4	positive	54	positive	228.039	positive	4.7	negative	6.5	negative	35	negative	5.938	negative	72.0	positive	1870.0	positive	133	positive	19.233	positive	5.2	negative	10.3	negative	4.8	negative	14.021	negative	positive	positive	negative	negative	positive	positive	positive	negative	positive	negative	negative
w	yes	no	no	APS	secondary	53	310.0	positive	1325.1	positive	83	positive	>315,0	positive	7.0	positive	24.3	positive	37	negative	19.162	positive	277.0	positive	9699.6	positive	363	positive	43.038	positive	5.2	negative	9.0	negative	3.7	negative	2.475	negative	positive	positive	negative	negative	positive	positive	positive	negative	positive	positive	negative
w	no	no	no	control	not applicable	33	2.2	negative	1.7	negative	1.1	negative	2.998	negative	0.7	negative	1.1	negative	0.9	negative	0.652	negative	2.3	negative	6.0	negative	0.9	negative	0.542	negative	1.2	negative	0.2	negative	0	negative	0.594	negative	negative	positive	negative	negative	negative	negative	negative	negative	negative	negative	negative
w	no	no	no	control	not applicable	57	2.4	negative	3.4	negative	1.2	negative	3.398	negative	0.8	negative	4.4	negative	6.3	negative	1.927	negative	2.4	negative	2.1	negative	1.1	negative	0.632	negative	1.5	negative	1.9	negative	0	negative	1.656	negative	negative	negative	negative	negative	negative	negative	negative	negative	negative	negative	negative
w	no	no	no	control	not applicable	50	2.5	negative	18.8	negative	1.6	negative	4.034	negative	0.8	negative	1.7	negative	0	negative	0.806	negative	2.3	negative	1.7	negative	1	negative	0.500	negative	1.5	negative	0.5	negative	0	negative	1.085	negative	negative	negative	negative	negative	negative	negative	negative	negative	negative	negative	negative
w	no	no	no	control	not applicable	28	3.5	negative	4.9	negative	1.7	negative	4.418	negative	0.9	negative	2.8	negative	1	negative	1.941	negative	2.3	negative	5.3	negative	2.7	negative	0.617	negative	1.4	negative	0.8	negative	0	negative	1.133	negative	negative	negative	negative	negative	negative	negative	negative	negative	negative	negative	negative
w	no	no	no	control	not applicable	39	2.5	negative	2.7	negative	1.1	negative	1.702	negative	1.2	negative	3.7	negative	0.8	negative	0.497	negative	2.3	negative	2.7	negative	0.8	negative	0.590	negative	1.9	negative	1.9	negative	0.1	negative	0.619	negative	negative	negative	negative	negative	negative	negative	negative	negative	negative	negative	negative
w	no	no	no	control	not applicable	43	2.9	negative	4.9	negative	2.1	negative	1.981	negative	1.5	negative	7.6	negative	6.4	negative	3.588	negative	2.2	negative	3.0	negative	1	negative	0.525	negative	2.0	negative	1.5	negative	1	negative	2.665	negative	negative	negative	negative	negative	negative	negative	negative	negative	negative	negative	negative
w	yes	no	no	APS	primary	41	14.9	positive	3.5	negative	1.2	negative	12.115	negative	76.3	positive	270.6	positive	144	positive	93.156	positive	12.2	positive	16.3	negative	1	negative	1.020	negative	94.8	positive	189.0	positive	119	positive	29.279	positive	negative	positive	negative	negative	negative	negative	negative	negative	negative	negative	positive
m	no	yes	no	APS	primary	35	34.7	positive	136.5	positive	72	positive	76.859	positive	1.4	negative	4.0	negative	5.8	negative	2.459	negative	28.5	positive	339.3	positive	24	positive	3.285	negative	1.9	negative	1.8	negative	0.5	negative	3.401	negative	positive	positive	negative	negative	positive	positive	positive	positive	positive	negative	negative
w	no	yes	no	APS	primary	62	3.3	negative	1.6	negative	0.7	negative	2.623	negative	3.7	negative	13.3	negative	2.4	negative	7.988	negative	2.8	negative	2.2	negative	0.8	negative	0.736	negative	4.0	negative	6.0	negative	4.4	negative	2.828	negative	negative	negative	negative	negative	negative	negative	negative	negative	negative	negative	negative
w	no	yes	yes	APS	secondary	35	186.0	positive	2542.7	positive	2220	positive	>315,0	positive	1.5	negative	2.3	negative	0.1	negative	3.660	negative	122.0	positive	9385.3	positive	156	positive	37.249	positive	1.9	negative	1.1	negative	0.1	negative	2.085	negative	positive	positive	negative	negative	positive	positive	positive	negative	positive	positive	negative
w	no	no	no	control	not applicable	23	2.8	negative	6.2	negative	2.1	negative	2.906	negative	1.2	negative	1.6	negative	1.3	negative	1.229	negative	2.4	negative	2.5	negative	0.7	negative	0.666	negative	1.7	negative	0.8	negative	0	negative	2.477	negative	negative	negative	negative	negative	negative	negative	negative	negative	negative	negative	negative
m	no	no	no	control	not applicable	37	3.9	negative	2.7	negative	1.8	negative	4.983	negative	0.8	negative	1.3	negative	1.3	negative	0.544	negative	3.8	negative	1.7	negative	2.3	negative	1.651	negative	1.5	negative	0.5	negative	0	negative	0.577	negative	negative	negative	negative	negative	negative	negative	negative	negative	negative	negative	negative
w	no	no	no	control	not applicable	26	2.7	negative	2.6	negative	3.3	negative	2.244	negative	1.0	negative	3.3	negative	7.8	negative	1.882	negative	2.7	negative	3.0	negative	0.4	negative	0.533	negative	1.7	negative	0.9	negative	0	negative	1.959	negative	negative	negative	negative	negative	negative	negative	negative	negative	positive	negative	negative
m	no	no	no	control	not applicable	44	2.5	negative	5.6	negative	2.6	negative	3.471	negative	0.6	negative	1.3	negative	0	negative	0.853	negative	2.4	negative	4.7	negative	0.8	negative	0.868	negative	1.4	negative	0.6	negative	0	negative	0.692	negative	negative	negative	negative	negative	negative	negative	negative	negative	positive	negative	negative
w	no	no	no	control	not applicable	25	2.5	negative	3.1	negative	1.4	negative	2.938	negative	1.5	negative	3.0	negative	0.6	negative	0.738	negative	3.0	negative	2.3	negative	0.9	negative	0.726	negative	2.5	negative	1.5	negative	0.1	negative	1.925	negative	negative	negative	negative	negative	negative	positive	negative	negative	negative	negative	negative
w	no	no	no	control	not applicable	63	2.4	negative	1.3	negative	1.5	negative	4.704	negative	1.1	negative	1.5	negative	13	negative	0.908	negative	2.6	negative	1.9	negative	0.7	negative	0.470	negative	1.8	negative	0.3	negative	0	negative	4.783	negative	negative	negative	negative	negative	negative	negative	negative	negative	negative	negative	negative
m	yes	no	no	APS	primary	40	117.0	positive	729.2	positive	446	positive	>315,0	positive	43.1	positive	51.5	positive	73	positive	54.495	positive	105.0	positive	2729.1	positive	85	positive	42.064	positive	49.7	positive	81.3	positive	53	positive	32.300	positive	positive	positive	negative	negative	positive	positive	positive	negative	positive	positive	positive
w	no	yes	yes	APS	secondary	48	61.0	positive	1521.1	positive	301	positive	>315,0	positive	1.3	negative	3.2	negative	12	negative	2.412	negative	67.0	positive	1871.4	positive	97	positive	26.088	positive	2.0	negative	2.7	negative	0.8	negative	1.699	negative	positive	positive	negative	negative	positive	positive	positive	negative	positive	negative	negative
m	yes	yes	no	APS	primary	56	3.1	negative	1.9	negative	0.8	negative	4.542	negative	0.8	negative	4.0	negative	21	negative	1.317	negative	2.8	negative	10.1	negative	0.4	negative	0.855	negative	1.6	negative	1.1	negative	0	negative	0.929	negative	negative	negative	negative	negative	negative	negative	negative	negative	negative	negative	negative
w	no	yes	no	APS	secondary	74	30.3	positive	3.3	negative	5.5	negative	50.328	positive	89.0	positive	429.8	positive	316	positive	211.377	positive	25.8	positive	10.7	negative	0.6	negative	2.326	negative	74.0	positive	133.1	positive	115	positive	86.083	positive	negative	negative	negative	negative	negative	negative	negative	negative	negative	negative	positive
m	no	yes	no	APS	primary	32	17.1	positive	3.2	negative	14	positive	54.787	positive	0.6	negative	1.1	negative	1.1	negative	0.568	negative	3.7	negative	6.2	negative	5.1	negative	4.237	negative	1.5	negative	0.8	negative	0	negative	0.344	negative	positive	positive	negative	negative	positive	positive	positive	negative	positive	positive	negative
w	no	yes	no	APS	primary	60	18.4	positive	121.7	positive	217	positive	162.503	positive	2.3	negative	12.2	negative	9.4	negative	7.434	negative	15.1	positive	321.7	positive	17	positive	1.996	negative	2.2	negative	7.8	negative	0	negative	3.695	negative	positive	positive	negative	negative	positive	positive	positive	negative	positive	negative	negative
w	no	yes	no	APS	primary	53	727.0	positive	4199.1	positive	334	positive	>315,0	positive	37.8	positive	44.3	positive	112	positive	59.665	positive	532.0	positive	13514.2	positive	250	positive	81.149	positive	41.5	positive	107.3	positive	68	positive	19.350	positive	positive	positive	negative	negative	positive	positive	positive	negative	positive	positive	positive
m	no	yes	no	APS	primary	43	15.3	positive	79.0	positive	9.2	negative	44.193	positive	0.9	negative	1.6	negative	0	negative	0.000	negative	5.5	negative	304.1	positive	36	positive	1.677	negative	1.7	negative	1.0	negative	0	negative	0.483	negative	positive	positive	negative	negative	positive	positive	positive	negative	positive	positive	negative
m	no	yes	no	APS	primary	43	4.6	negative	72.4	positive	3.2	negative	22.362	positive	1.0	negative	4.5	negative	10	negative	0.027	negative	3.6	negative	121.0	positive	1.2	negative	1.211	negative	2.4	negative	2.6	negative	0.2	negative	2.635	negative	positive	positive	negative	negative	positive	positive	positive	negative	positive	positive	negative
m	no	yes	no	APS	primary	79	4.3	negative	1.8	negative	4.2	negative	139.861	positive	0.8	negative	5.5	negative	0	negative	0.682	negative	3.0	negative	3.3	negative	3.1	negative	1.644	negative	1.5	negative	1.1	negative	0	negative	0.422	negative	positive	positive	negative	negative	positive	positive	positive	negative	negative	negative	negative
w	yes	no	yes	APS	secondary	37	2.6	negative	8.9	negative	2.2	negative	1.699	negative	1.8	negative	20.7	positive	0.5	negative	0.906	negative	2.6	negative	4.1	negative	0.6	negative	0.046	negative	2.1	negative	9.9	negative	0	negative	4.315	negative	negative	positive	negative	negative	negative	negative	positive	negative	positive	negative	negative
w	no	yes	no	APS	secondary	44	4.9	negative	25.9	positive	7.9	negative	5.864	negative	1.0	negative	1.8	negative	4	negative	0.061	negative	7.8	negative	150.6	positive	34	positive	0.479	negative	1.9	negative	2.0	negative	0.1	negative	0.920	negative	negative	positive	negative	negative	positive	negative	positive	negative	positive	positive	negative
w	no	yes	no	APS	unknown	46	37.4	positive	178.5	positive	7.6	negative	98.416	positive	1.6	negative	3.7	negative	3.1	negative	0.238	negative	20.8	positive	597.0	positive	11	positive	1.791	negative	1.9	negative	2.8	negative	0.5	negative	1.435	negative	positive	positive	negative	negative	positive	positive	positive	negative	positive	negative	negative
w	no	yes	no	APS	primary	70	34.0	positive	491.6	positive	12	positive	222.915	positive	1.5	negative	3.5	negative	0.3	negative	0.179	negative	42.6	positive	770.9	positive	91	positive	1.351	negative	1.4	negative	1.8	negative	0	negative	0.730	negative	positive	positive	negative	negative	positive	positive	positive	negative	positive	negative	negative
w	yes	yes	no	APS	secondary	44	3.8	negative	9.4	negative	3.8	negative	5.920	negative	1.6	negative	3.0	negative	8.7	negative	0.101	negative	3.2	negative	13.1	negative	2.8	negative	0.160	negative	2.3	negative	3.3	negative	1	negative	1.239	negative	negative	positive	negative	negative	negative	negative	negative	negative	negative	negative	negative
w	yes	no	no	APS	secondary	42	9.6	negative	124.8	positive	74	positive	69.877	positive	1.6	negative	4.1	negative	0	negative	0.379	negative	7.8	negative	663.3	positive	13	positive	2.511	negative	1.7	negative	2.4	negative	0	negative	0.489	negative	positive	positive	negative	negative	positive	positive	positive	negative	positive	negative	positive
w	no	no	no	control	not applicable	29	2.6	negative	21.7	positive	1.3	negative	3.712	negative	0.9	negative	2.4	negative	8.2	negative	0.886	negative	2.7	negative	23.4	positive	1.1	negative	1.616	negative	1.5	negative	1.0	negative	0	negative	1.604	negative	negative	negative	negative	negative	negative	negative	negative	negative	negative	positive	negative
w	no	no	yes	APS	primary	43	70.3	positive	0.1	negative	1.1	negative	152.756	positive	2.7	negative	6.8	negative	1.7	negative	6.967	negative	2.5	negative	2.0	negative	0.9	negative	0.927	negative	2.0	negative	1.1	negative	0	negative	2.272	negative	positive	positive	negative	negative	positive	negative	positive	negative	positive	positive	negative
w	no	yes	no	APS	primary	25	96.0	positive	829.7	positive	53	positive	>315,0	positive	7.7	positive	8.1	negative	8.8	negative	0.823	negative	98.0	positive	2770.1	positive	126	positive	8.624	negative	3.6	negative	6.2	negative	3.8	negative	3.531	negative	positive	positive	negative	negative	positive	positive	positive	negative	positive	positive	negative
m	no	yes	no	APS	primary	46	17.5	positive	67.3	positive	4.1	negative	127.749	positive	2.2	negative	9.3	negative	0.7	negative	5.665	negative	7.1	negative	1704.4	positive	96	positive	3.299	negative	2.3	negative	3.9	negative	0	negative	2.995	negative	positive	positive	negative	negative	positive	positive	positive	negative	positive	positive	negative
w	no	yes	no	APS	secondary	28	5.4	negative	18.0	negative	14	positive	7.143	negative	1.9	negative	3.3	negative	4.5	negative	0.202	negative	3.5	negative	11.2	negative	1.9	negative	0.432	negative	2.4	negative	3.3	negative	1.3	negative	2.808	negative	positive	positive	negative	negative	positive	negative	positive	negative	positive	negative	negative
w	yes	no	no	APS	primary	39	91.0	positive	1294.8	positive	1577	positive	>315,0	positive	11.4	positive	13.1	negative	5	negative	25.513	positive	81.0	positive	6012.5	positive	105	positive	19.185	positive	3.6	negative	8.7	negative	2.3	negative	3.931	negative	positive	positive	negative	negative	positive	positive	positive	negative	positive	positive	positive
w	no	yes	no	APS	secondary	43	10.7	positive	73.2	positive	26	positive	22.864	positive	13.3	positive	21.6	positive	25	negative	16.772	negative	9.6	positive	247.9	positive	35	positive	2.220	negative	12.4	positive	27.2	positive	19	positive	13.642	negative	negative	positive	negative	negative	negative	negative	negative	negative	positive	negative	negative
w	yes	no	no	APS	secondary	53	4.5	negative	34.4	positive	4.9	negative	28.487	positive	0.8	negative	1.8	negative	6.8	negative	0.588	negative	2.8	negative	132.3	positive	1.4	negative	1.371	negative	1.5	negative	1.1	negative	0	negative	0.310	negative	positive	positive	negative	negative	positive	positive	positive	negative	positive	negative	negative
m	no	yes	no	APS	primary	32	330.0	positive	2840.3	positive	274	positive	>315,0	positive	2.1	negative	6.9	negative	4.1	negative	0.456	negative	258.0	positive	10973.9	positive	286	positive	22.874	positive	3.1	negative	5.3	negative	0.6	negative	1.865	negative	positive	positive	negative	negative	positive	positive	positive	negative	positive	positive	negative
w	no	yes	no	APS	primary	52	9.7	negative	122.0	positive	88	positive	59.326	positive	1.8	negative	4.8	negative	1.3	negative	0.127	negative	7.9	negative	186.2	positive	5.7	negative	0.498	negative	2.2	negative	2.8	negative	0.2	negative	6.606	negative	positive	positive	negative	negative	positive	positive	positive	negative	positive	negative	negative
w	no	yes	no	APS	primary	23	196.0	positive	822.5	positive	193	positive	>315,0	positive	1.5	negative	2.3	negative	2	negative	0.197	negative	199.0	positive	4277.2	positive	209	positive	21.341	positive	2.1	negative	1.6	negative	0	negative	1.336	negative	positive	positive	negative	negative	positive	positive	positive	negative	positive	positive	negative
w	no	yes	no	APS	primary	49	62.0	positive	995.7	positive	112	positive	>315,0	positive	15.6	positive	14.2	negative	5.2	negative	14.676	negative	66.9	positive	2734.1	positive	55	positive	5.876	negative	6.1	negative	15.0	negative	8.3	negative	4.961	negative	positive	positive	negative	negative	positive	positive	positive	negative	positive	negative	negative
w	no	yes	no	APS	primary	25	76.0	positive	814.6	positive	52	positive	>315,0	positive	8.7	positive	10.2	negative	9	negative	8.049	negative	72.0	positive	2816.4	positive	118	positive	22.513	positive	4.5	negative	6.9	negative	6.2	negative	4.944	negative	positive	positive	negative	negative	positive	positive	positive	negative	positive	negative	negative
w	no	yes	no	APS	primary	37	18.3	positive	10.5	negative	4.4	negative	28.618	positive	81.0	positive	130.2	positive	55	positive	94.593	positive	11.2	positive	15.6	negative	1.8	negative	2.299	negative	79.0	positive	147.2	positive	90	positive	51.042	positive	positive	negative	negative	negative	negative	negative	negative	negative	negative	negative	positive
w	no	yes	no	APS	secondary	27	5.3	negative	25.4	positive	18	positive	14.965	negative	1.6	negative	3.8	negative	4.2	negative	2.505	negative	3.5	negative	16.7	negative	2.2	negative	1.542	negative	2.3	negative	4.8	negative	0.8	negative	2.896	negative	positive	positive	negative	negative	positive	positive	positive	negative	positive	negative	negative
m	no	yes	no	APS	primary	39	46.0	positive	670.7	positive	70	positive	>315,0	positive	2.3	negative	6.8	negative	3.9	negative	3.486	negative	73.3	positive	2986.3	positive	97	positive	16.342	negative	2.7	negative	2.1	negative	0.3	negative	10.473	negative	positive	positive	negative	negative	positive	positive	positive	negative	positive	positive	negative
m	no	yes	no	APS	secondary	38	115.0	positive	1328.5	positive	261	positive	>315,0	positive	1.2	negative	2.3	negative	2.8	negative	2.582	negative	75.0	positive	5095.4	positive	115	positive	14.722	negative	1.8	negative	0.8	negative	0	negative	3.156	negative	positive	positive	negative	negative	positive	positive	positive	negative	positive	positive	negative
w	no	yes	no	APS	primary	28	25.0	positive	53.2	positive	3.1	negative	53.085	positive	231.0	positive	280.9	positive	2961	positive	36.921	positive	26.1	positive	81.0	positive	2.3	negative	0.922	negative	248.0	positive	649.9	positive	378	positive	152.035	positive	positive	positive	negative	negative	negative	negative	positive	negative	positive	negative	positive
w	yes	no	no	APS	primary	20	9.1	negative	75.5	positive	8	negative	15.640	negative	1.6	negative	4.4	negative	6.6	negative	0.263	negative	5.5	negative	58.8	positive	5.1	negative	0.616	negative	2.2	negative	2.7	negative	0.2	negative	3.094	negative	positive	positive	negative	negative	negative	negative	positive	positive	positive	negative	negative
w	no	no	yes	APS	primary	56	8.0	negative	5.8	negative	1.5	negative	10.893	negative	140.0	positive	267.9	positive	134	positive	143.126	positive	6.7	negative	10.5	negative	1	negative	1.490	negative	108.0	positive	85.7	positive	48	positive	72.003	positive	negative	negative	negative	negative	negative	negative	negative	negative	negative	negative	negative
m	no	no	no	control	not applicable	31	2.3	negative	0.7	negative	0.7	negative	1.051	negative	0.8	negative	0.4	negative	0	negative	0.198	negative	2.0	negative	2.0	negative	0.4	negative	0.593	negative	1.3	negative	0.1	negative	0	negative	0.621	negative	negative	negative	negative	negative	negative	negative	negative	negative	negative	negative	negative
w	no	no	no	control	not applicable	29	2.2	negative	3.2	negative	3.9	negative	1.345	negative	0.8	negative	1.7	negative	0.2	negative	0.558	negative	1.9	negative	2.9	negative	0.6	negative	0.552	negative	1.4	negative	0.8	negative	0	negative	1.963	negative	negative	negative	negative	negative	negative	negative	negative	positive	negative	negative	negative
[truncated: 42 more columns]
